# Supplementary material
Source: Royal Society of Chemistry journal article supplement (https://www.rsc.org/suppdata/p2/1999/1675/903059j.doc)
Supplement: Supplementary file 1 [file 903059j.doc]

**Figure S1.** Plot of the 1H chemical shifts of the signals of selected aromatic protons of **L1** and ATP against the ATP/**L1** ratio at pH 4.5. (Labels refer to scheme 1)

**Figure S2.** Plot of the 1H chemical shifts of the signals of selected aromatic protons of **L1** and ADP against the ADP/**L1** ratio at pH 4.5. (Labels refer to scheme 1)

**Figure S3.** Plot of the 1H chemical shifts of the signals of selected aromatic protons of **L2** and ATP against the ATP/**L2** ratio at pH 4.8. (Labels refer to scheme 1)

**Figure S4.** Plot of the 1H chemical shifts of the signals of selected aromatic protons of **L2** and ADP against the ADP/**L2** ratio at pH 4.8. (Labels refer to scheme 1)

**Figure 5s**. **a**: Experimental 1H chemical shifts for the aromatic protons of free **L1** (_____) and of **L1** in presence of ATP(……); **b**: overall percentages of free ATP, **L1** and ATP-**L1** complexes; **c**: experimental 1H chemical shifts for the H2, H8 and H1’ protons of free ATP (_____) and of ATP in presence of **L1** (……). In all experiments **L1** and ATP were in 1:1 molar ratio (both 1.10-2 mol dm-3), T = 298 K.
